# Supplementary material for: Nanocarbon armor reinforced Ag particles to build a high-rate and long-lifespan aqueous Zn2+/Cl− dual-ion battery
Source: Royal Society of Chemistry journal article supplement (doi:10.1039/d4qi00499j), 2024-01-01
Supplement: d4qi00499j1.pdf [file d4qi00499j1.pdf]

## Supporting Information

# Nanocarbon armor reinforced Ag particles to build high-rate and long-lifespan aqueous Zn<sup>2+</sup>/Cl<sup>-</sup> dual-ion battery

Wenbo Guo <sup>1,†</sup>, Tianyuan Zhang <sup>1,†</sup>, Guangchang Shu <sup>1</sup>, Leiyu Fan <sup>1</sup>, Zhouxiang Wu <sup>1</sup>,  
Lei Yan <sup>1</sup>, Liyuan Zhang <sup>1</sup>, Haoxiang Yu <sup>1,2,\*</sup>, Ting-Feng Yi <sup>3</sup>, Jie Shu <sup>1,2,\*</sup>

<sup>1</sup> School of Materials Science and Chemical Engineering, Ningbo University, Ningbo,  
315211, Zhejiang, China

<sup>2</sup> Key Laboratory of Advanced Energy Materials Chemistry (Ministry of Education),  
Nankai University, Tianjin 300071, China

<sup>3</sup> Key Laboratory of Dielectric and Electrolyte Functional Material Hebei Province,  
School of Resources and Materials, Northeastern University at Qinhuangdao,  
Qinhuangdao 066004, China

† These authors contributed equally

\* Corresponding author:

E-mail: [yuhaoxiang@nbu.edu.cn](mailto:yuhaoxiang@nbu.edu.cn) (Haoxiang Yu), [shujie@nbu.edu.cn](mailto:shujie@nbu.edu.cn) (Jie Shu)

## **Experimental**

### *Material preparation*

All reagents were of analytical grade and purchased from Aladdin (Shanghai, China). Ag@C particles were synthesized by CVD. In the synthetic process, 0.2 g of nano silver powder and 1 g of glucose were loaded into two porcelain boats, respectively. They were put in a tube furnace and heated at 500 °C for 2 hours. Finally, core-shell Ag@C particles were obtained.

### *Materials characterization*

The phases and structures of Ag@C were analyzed using XRD (Bruker D8 Focus). The hydrophilicity of Ag@C was determined by measuring the contact angle using a goniometer (JC2000A). The morphologies of Ag@C were analyzed using various techniques including TEM (JEM-2010), SEM (Hitachi SU-70), and EDS. SAED (JEOL JEM-2010) was performed to determine the element composition of Ag and C. The microstructure of Ag@C was observed through high-resolution TEM (JEOL). Additionally, XPS (Thermokalpha) was utilized to assess the surface chemical properties of Ag@C.

### *Electrochemical measurements*

Working electrode was prepared by mixing Ag@C particles, carbon black, and polytetrafluoroethylene in a mass ratio of 8:1:1. Subsequently, the slurry was evenly cast onto the carbon paper, which was dried in vacuum at 60 °C for 5 hours. In each cell, zinc sheet was served as the counter and reference electrode. The electrolyte was 0.1 M ZnCl<sub>2</sub> dissolved in distilled water. GCD tests and GITT were measured on

LANHE CT2001A battery testing system. Additionally, CV analysis was conducted using CHI760E electrochemical workstation within a voltage range from 0.7 to 1.4 V.

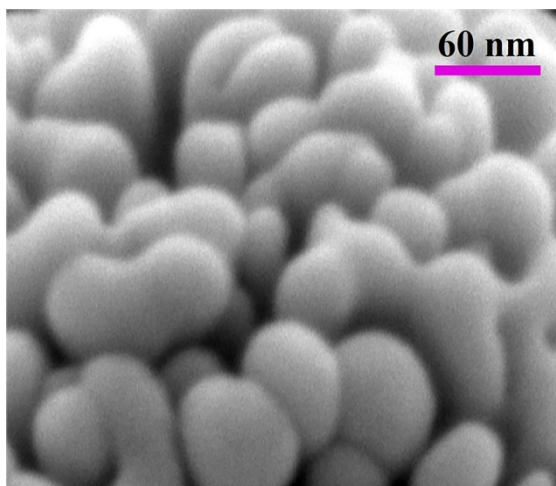

**Fig. S1.** SEM image of Ag@C.

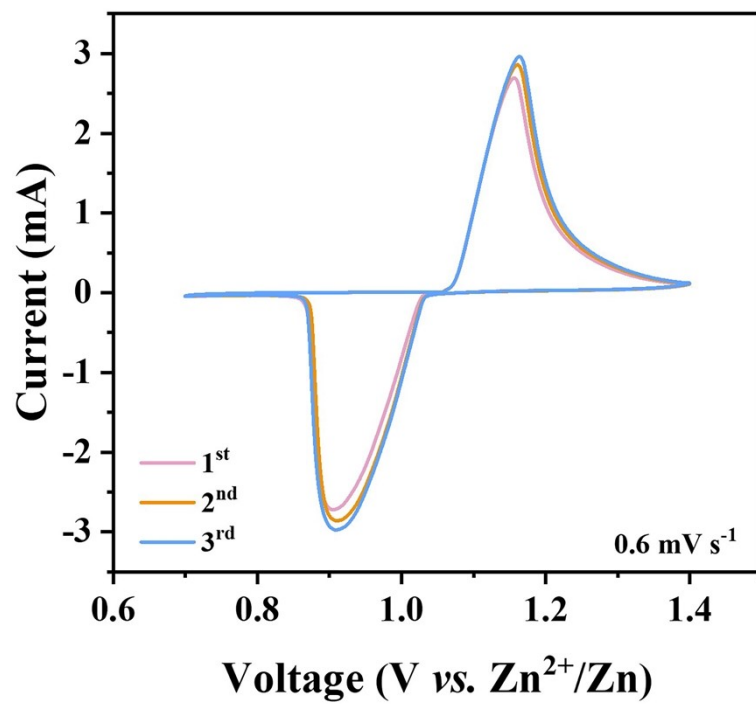

**Fig. S2.** CV curves of Zn<sup>2+</sup>/Cl<sup>-</sup> dual-ion battery with Ag cathode.

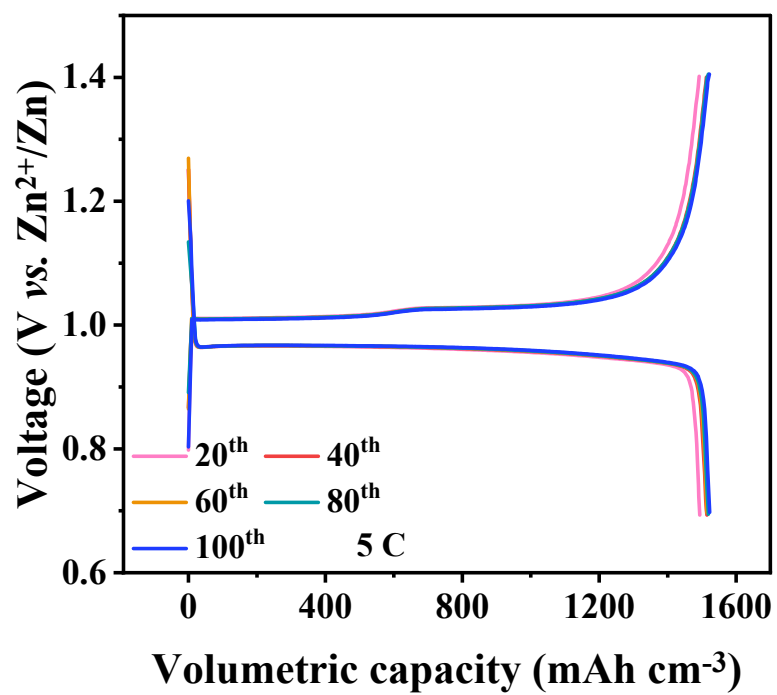

**Fig. S3.** GCD curves of Zn<sup>2+</sup>/Cl<sup>-</sup> dual-ion battery with Ag@C cathode.

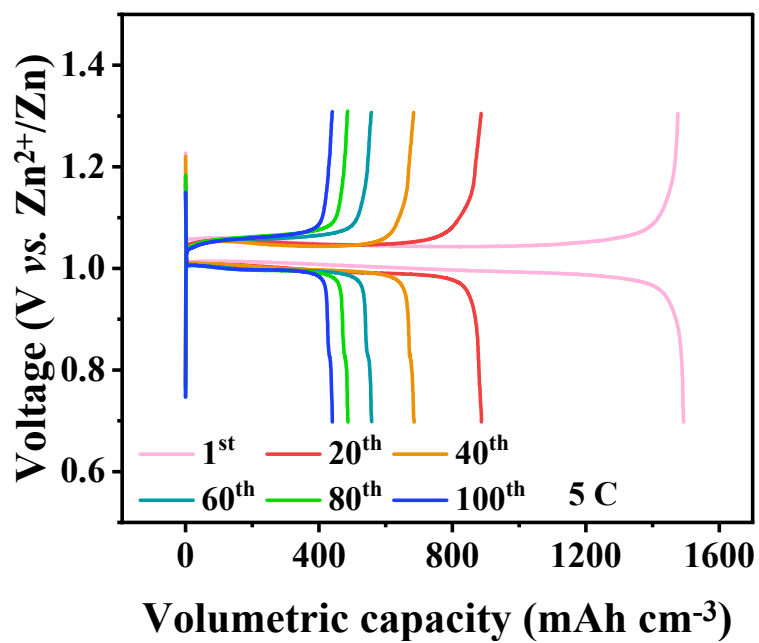

**Fig. S4.** GCD curves of Zn<sup>2+</sup>/Cl<sup>-</sup> dual-ion battery with Ag cathode.

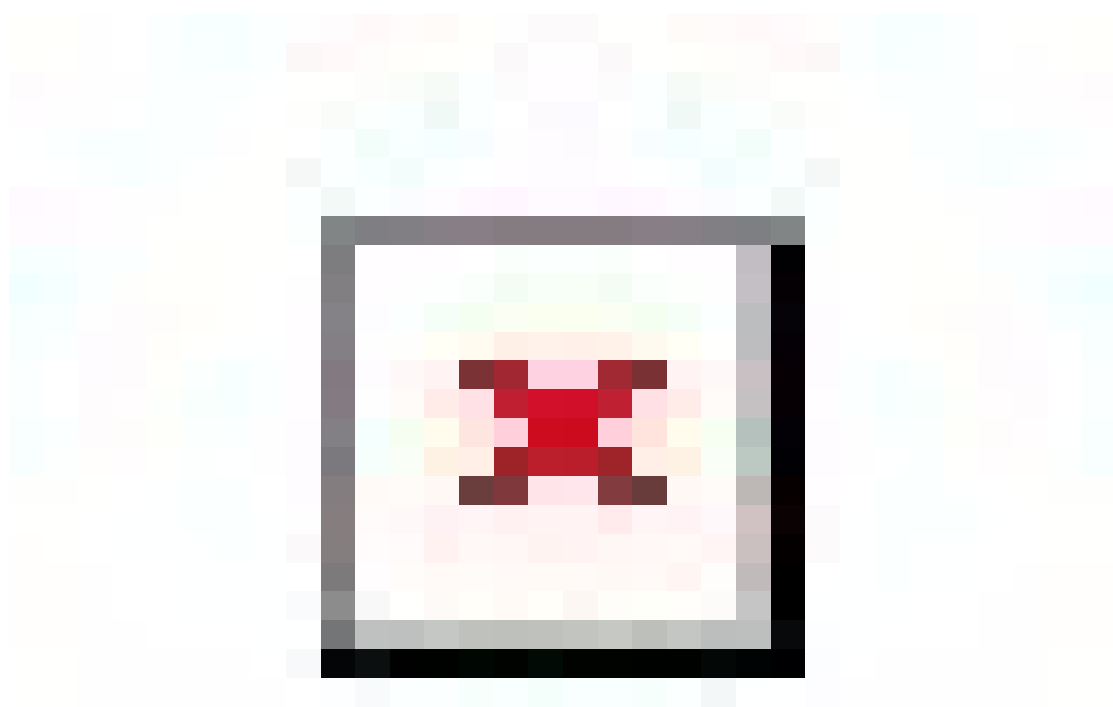

**Fig. S5.** (a) Galvanostatic charge/discharge (GCD) curves of  $\text{Zn}^{2+}/\text{Cl}^-$  dual-ion battery with Ag cathode at different current rates. (b) Plateau contribution and plateau voltage of discharging process for  $\text{Zn}^{2+}/\text{Cl}^-$  dual-ion battery with Ag cathode at different current rates. (c) Rate performance of  $\text{Zn}^{2+}/\text{Cl}^-$  dual-ion battery with Ag cathode.



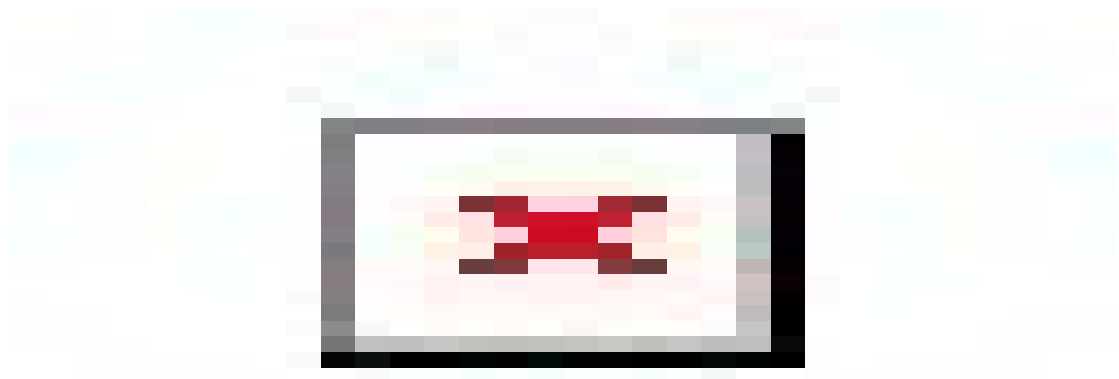

**Fig. S6.** Cycling performance of  $\text{Zn}^{2+}/\text{Cl}^-$  dual-ion battery with Ag cathode at 20 C.

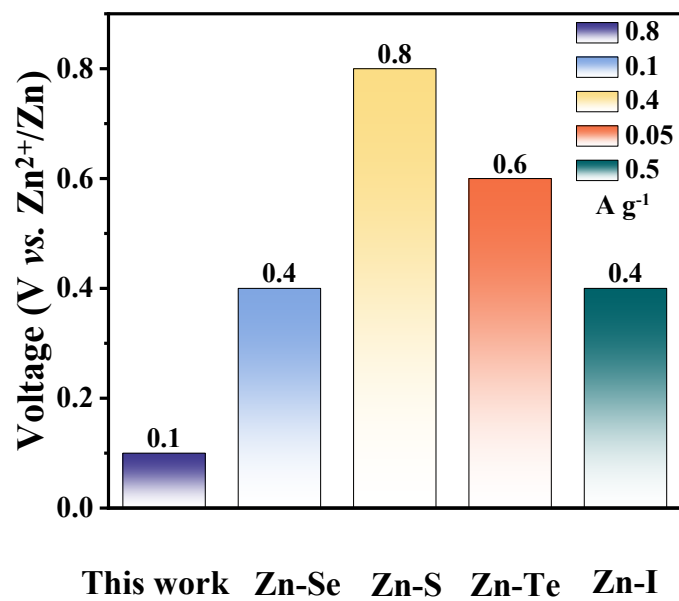

**Fig. S7.** Comparison in polarization between this work and other ZIBs.

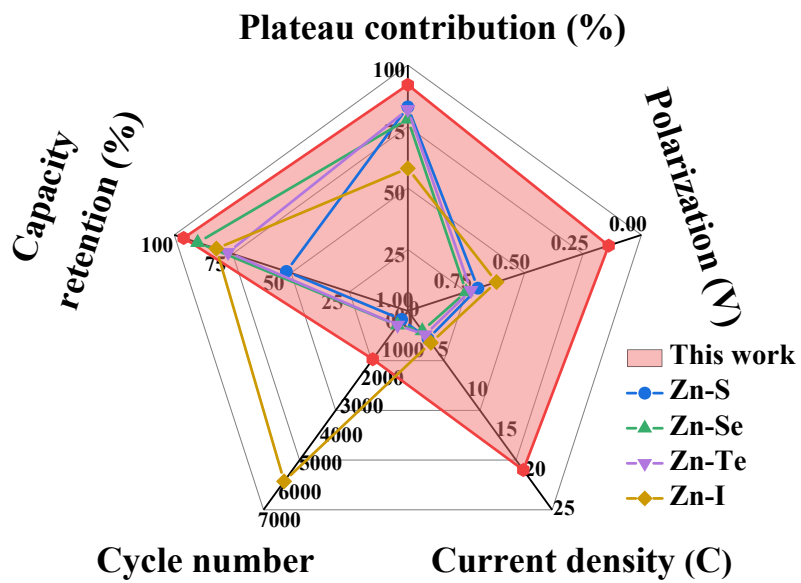

Fig. S8. Comparison between this work and other ZIBs.

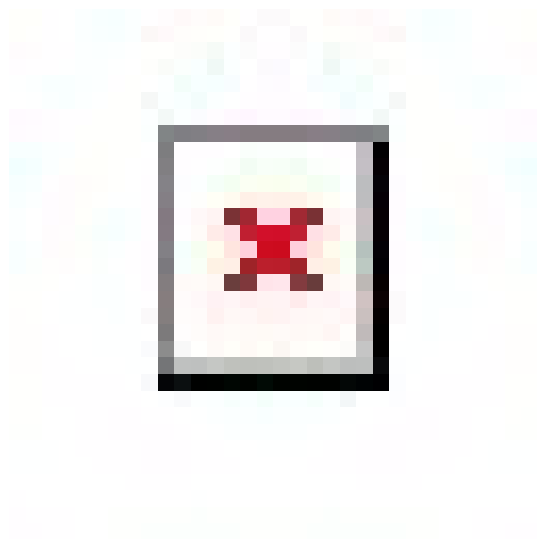

**Fig. S9.** TEM image of Ag@C cathode after cycling.
